# Supplementary material for: SDF‐1 inhibits the dedifferentiation of islet β cells in hyperglycaemia by up‐regulating FoxO1 via binding to CXCR4
Source: PubMed Central journal article supplement (PMC8817121; doi:10.1111/jcmm.17110), 2021-12-21

**A**

Glucose with different concentrations (mmol/L)

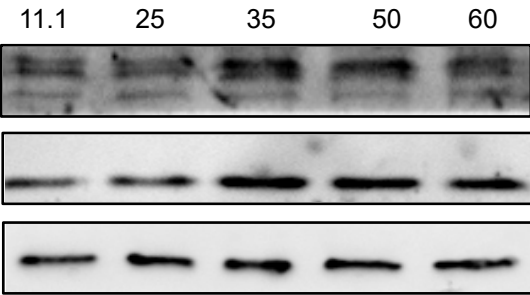

**B**

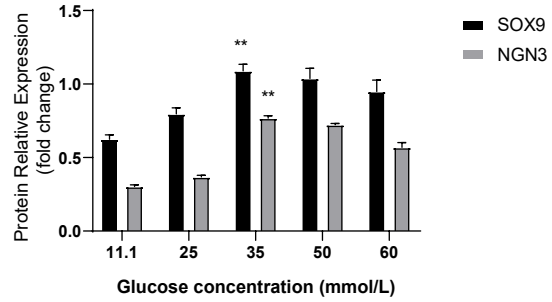

**C**

Different time of glucose intervention (hours)

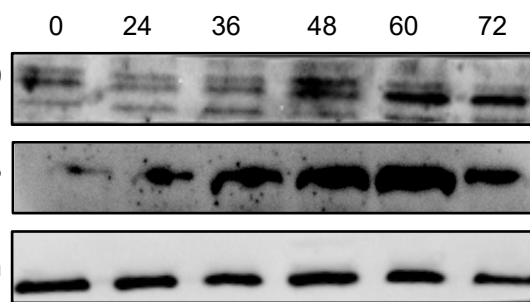

**D**

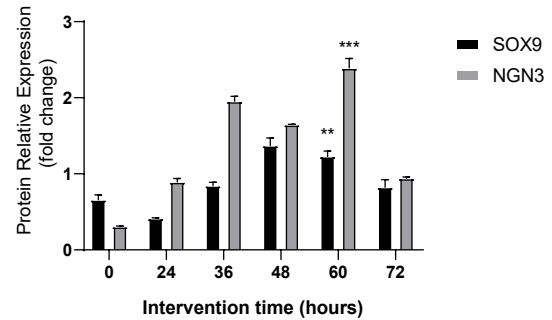

**E**

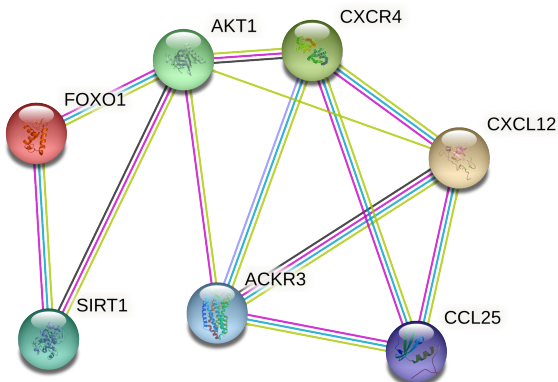

Supplement: JCMM-26-750-s001.pdf [file JCMM-26-750-s001.pdf]
